# Supplementary material
Source: PubMed Central journal article supplement (PMC2892740)

**Supplemental Figure 1.** *Spalt4* in situ hybridization of experimentally treated embryos.

**A.** Embryo electroporated with a Pax2CIG overexpression construct on the right side.

*Spalt4* expressing cells can be detected in the extraembryonic ectoderm (arrow) on the electroporated side but not on the non-electroporated side. **B.** Embryo electroporated

with the Pax2 morpholino on the right side. The otic pit fails to form properly in the

electroporated side (arrow) with decreased expression of *spalt4*, while the non-

electroporated side looks normal.

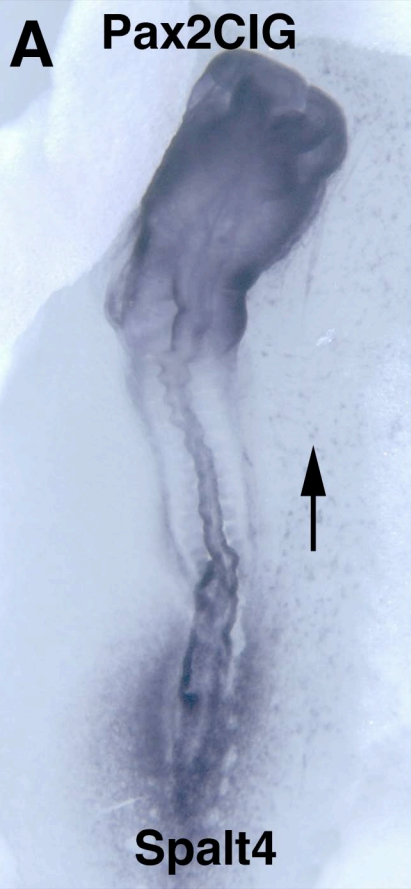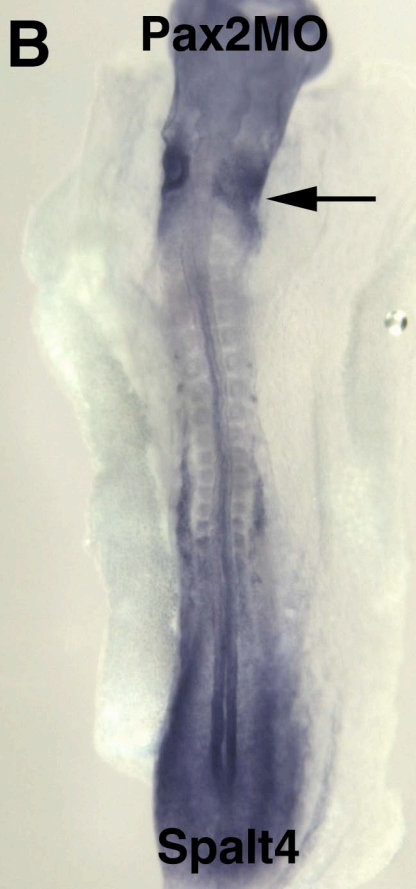

Supplement: NIHMS208499-supplement-01.pdf [file NIHMS208499-supplement-01.pdf]
